# Supplementary material for: Dynamic patterns of expression for genes regulating cytokinin metabolism and signaling during rice inflorescence development
Source: PubMed Central journal article supplement (PMC5395194; doi:10.1371/journal.pone.0176060), 2017-04-18
Supplement: pone.0176060.s002.pdf [file pone.0176060.s002.pdf]

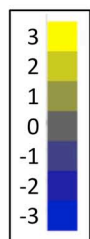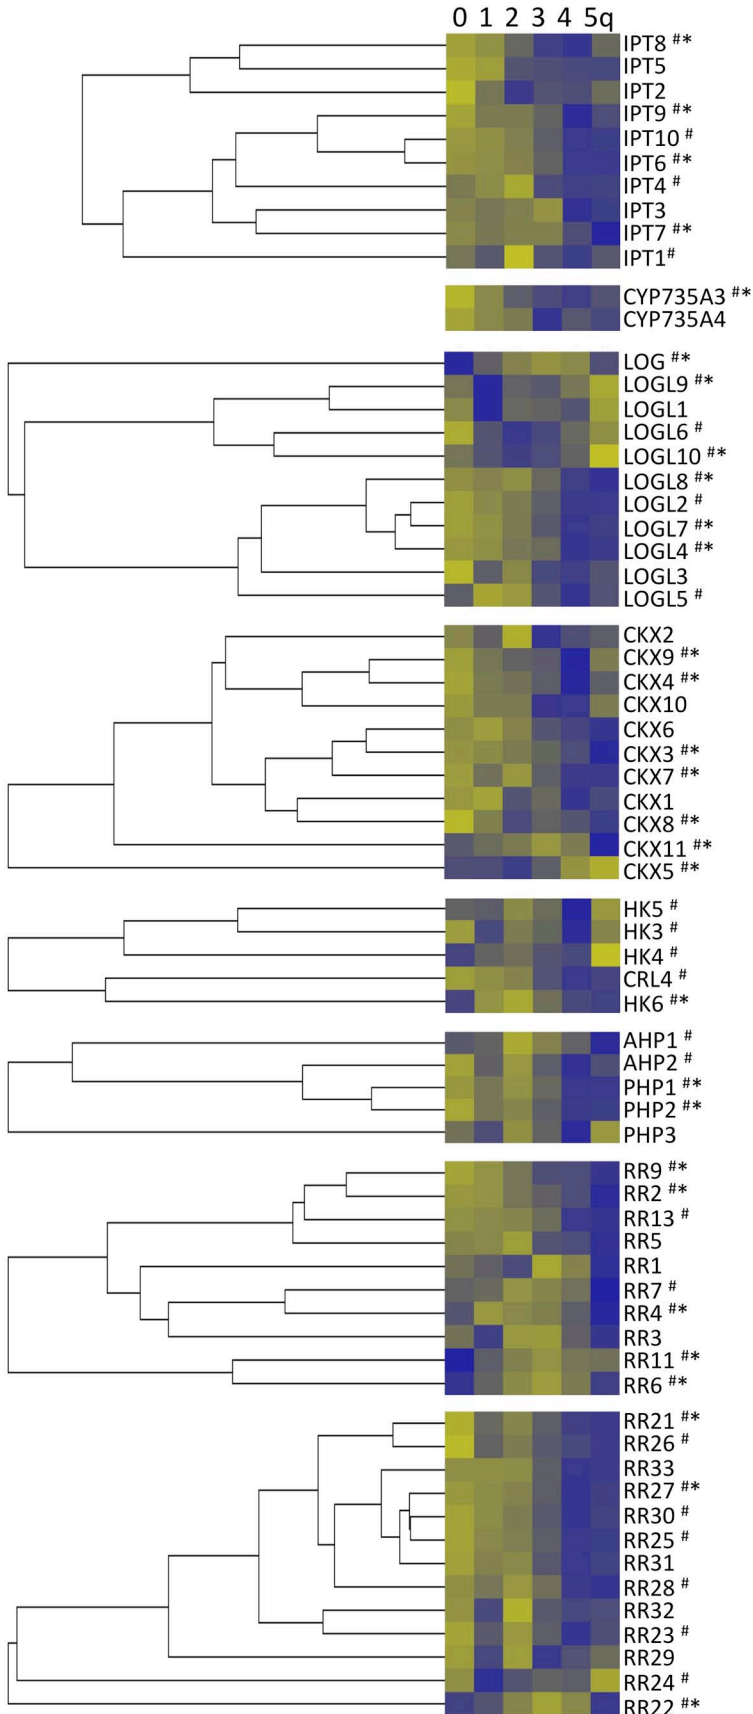

S2 Fig
